# Supplementary material for: Association of retinol and carotenoids content in diet and serum with risk for Colorectal cancer: a meta-analysis
Source: Research Square preprint supplement (doi:10.21203/rs.3.rs-1553815/v1), 2022-04-20
Supplement: Supplementary file 1 [file 2facab8157db807b23d2a7a5.xlsx]

## Sheet: Sheet1
Author	Year	cancer type	type of study	Diet/Serum	sample size	Nutrient Type	OR	lci	uci	NOS Score
Roswall	2010		Cohort study	Diet	56332/748					7
		rectal cancer				β-carotene	1.02	0.68	1.54
		Colon cancer				β-carotene	1.05	0.77	1.43
Maureen	2004	rectal cancer	Case-control study	Diet	952/1205	Lycopene(male)	0.9	0.6	1.4	7
						β-carotene(male)	0.9	0.5	1.4
						Lycopene(female)	1.7	1	2.8
						β-carotene(female)	1.1	0.6	1.9
						Lutein(male)	0.9	0.5	1.5
						Lutein(female)	0.9	0.5	1.7
Dawn	2010	Colorectal Cancer	Case-control study	Diet	945/959	β-carotene(Whites)	0.52	0.38	0.71	6
						β-carotene(African)	0.93	0.51	1.7
Park	2009		Cohort study	Diet	191004/2378					8
		rectal cancer				Lycopene(male)	1.06	0.84	1.33
						β-carotene(male)	0.76	0.5	1.17
						α-carotene(male)	0.91	0.6	1.37
						Carotenoids(male)	0.83	0.55	1.27
						Lycopene(female)	1.3	0.82	2.07
						β-carotene(female)	1.26	0.75	2.11
						α-carotene(female)	1.13	0.7	1.83
						Carotenoids(female)	1.52	0.91	2.55
						β-cryptoxanthin(male)	0.88	0.59	1.31
						β-cryptoxanthin(female)	0.92	0.56	1.51
						Lutein(male)	0.96	0.64	1.42
						Lutein(female)	1.44	0.86	2.41
		Colon cancer				Lycopene(male)	1.06	0.84	1.33
						β-carotene(male)	0.88	0.68	1.14
						α-carotene(male)	0.98	0.76	1.26
						Carotenoids(male)	1.14	0.89	1.46
						Lycopene(female)	0.94	0.74	1.19
						β-carotene(female)	0.89	0.67	1.18
						α-carotene(female)	1.04	0.79	1.35
						Carotenoids(female)	0.99	0.75	1.31
						β-cryptoxanthin(male)	0.88	0.68	1.12
						β-cryptoxanthin(female)	0.93	0.71	1.21
						Lutein(male)	0.95	0.75	1.21
						Lutein(female)	1.04	0.8	1.37
Slattery	2000	Colon cancer	Case-control study	Diet	1993/2410	α-carotene	0.88	0.71	1.09	7
						β-carotene	1.18	0.94	1.49
						Lycopene	0.96	0.79	1.19
						β-Cryptoxanthin	1.02	0.83	1.27
						Lutein	0.83	0.66	1.04
						Zeaxanthin	0.92	0.73	1.15
Leenders	2014		Case-control study	Diet	1399/1399					7
		Colon cancer				Retinol	1.14	0.84	1.55
						β-carotene	0.69	0.52	0.94
		rectal cancer				Retinol	0.86	0.55	1.32
						β-carotene	1.25	0.84	1.86
Terry	2015		Cohort study	Diet	56837/5681					7
		Colon cancer				α-carotene	0.9	0.5	1.5
						β-carotene	1.1	0.6	2.1
						Lycopene	1.3	0.8	2.2
						Carotenoids	1	0.6	1.8
						β-Cryptoxanthin	1.7	0.9	3.3
						Lutein	1	0.5	1.8
		rectal cancer				α-carotene	1.1	0.5	2.2
						β-carotene	1.7	0.7	4.1
						Lycopene	0.7	0.3	1.4
						Carotenoids	1.1	0.6	2.2
						β-Cryptoxanthin	0.7	0.3	1.4
						Lutein	2.1	0.9	4.9
Andre	2004	Colon cancer	Case-control study	Diet	402/688	α-carotene	1.04	0.71	1.52	7
						β-carotene	1.22	0.83	1.81
						Lycopene	0.71	0.49	1.03
						Carotenoids	1	0.68	1.48
						Lutein+ Zeaxanthin	1.2	0.82	1.75
						β-Cryptoxanthin	0.96	0.66	1.4
Wang	2014		Case-control study	Diet	816/815					6
		rectal cancer				Retinol(male)	1.61	1.01	2.58
						Carotenoids(male)	1.27	0.77	2.11
						Retinol(female)	0.66	0.35	1.23
						Carotenoids(female)	1.02	0.5	2.08
		Colon cancer				Retinol(male)	1.41	0.9	2.22
						Carotenoids(male)	1.31	0.77	2.23
						Retinol(female)	0.49	0.28	0.85
						Carotenoids(female)	0.8	0.44	1.47
Negri	2002	Colorectal Cancer	Case-control study	Diet	1953/4154	Lycopene	1.04	0.9	1.1	7
						Carotenoids	0.65	0.6	0.7
						Retinol	1.05	1	1.1
Levi	2000	Colorectal Cancer	Case-control study	Diet	223/491	Carotenoids	0.66	0.4	1.1	7
						Retinol	1.19	0.8	1.9
Lu	2015	Colorectal Cancer	Case-control study	Diet	845/845	Lycopene(male)	0.48	0.31	0.76	7
						β-carotene(male)	0.46	0.3	0.72
						α-carotene(male)	0.38	0.24	0.61
						β-Cryptoxanthin(male)	0.16	0.09	0.26
						Lutein+ Zeaxanthin(male)	0.65	0.42	1
						Lycopene(female)	0.42	0.26	0.68
						β-carotene(female)	0.92	0.58	1.47
						α-carotene(female)	0.58	0.37	0.9
						β-Cryptoxanthin(female)	0.3	0.18	0.49
						Lutein+ Zeaxanthin(female)	1.06	0.68	1.65
Paiva	2004	Colorectal Cancer	Case-control study	Diet	100/211	Carotenoids	0.53	0.18	1.6	7
Valentina	2013	Colorectal Cancer	Case-control study	Diet	329/1361	β-carotene	0.52	0.37	0.72	7
Timothy	2012	Colorectal Cancer	Case-control study	Diet	565/1951	Retinol	1.03	0.76	1.39	7
Nancy	2002		Cohort study	Diet	22071/267
		Colon cancer				β-carotene	0.9	0.7	1.2	7
		rectal cancer				β-carotene	1.1	0.7	1.8
Wakai	2006		Case-control study	Diet	507/2535					7
		Colon cancer				Carotenoids(male)	0.86	0.5	1.49
						Carotenoids(female)	0.92	0.51	1.65
						Retinol(male)	0.99	0.6	1.63
						Retinol(female)	1.2	0.67	2.17
		rectal cancer				Carotenoids(male)	1.05	0.58	1.91
						Carotenoids(female)	0.48	0.24	0.95
						Retinol(male)	1.18	0.67	2.08
						Retinol(female)	0.76	0.4	1.48
Shin	2006		Cohort study	Diet	73314/283					8
		Colon cancer				Carotenoids(female)	1	0.5	1.8
						Retinol(female)	0.7	0.4	1.3
		rectal cancer				Carotenoids(female)	1.6	0.8	3.2
						Retinol(female)	1.3	0.7	2.6
Kabat	2012	Colorectal Cancer	Cohort study	serum	5477/88	α-carotene	0.81	0.48	1.37	8
						β-carotene	0.81	0.48	1.37
						Lycopene	0.97	0.58	1.6
						β-Cryptoxanthin	1.1	0.67	1.83
						Lutein+ Zeaxanthin	1.31	0.76	2.28
						Retinol	1.58	0.89	2.81
Huang	2017	Colorectal Cancer	Case-control study	serum	538/564	α-carotene	0.49	0.33	0.72	7
						β-carotene	0.82	0.56	1.22
						Lycopene	0.36	0.24	0.54
						β-Cryptoxanthin	0.44	0.29	0.66
						Lutein+ Zeaxanthin	0.82	0.56	1.2
Luo	2019		Case-control study		535/552					7
		rectal cancer		serum		Retinol	0.41	0.2	0.71
		Colon cancer		serum		Retinol	0.22	0.13	0.36
Malila	2002	Colorectal Cancer	Cohort study	serum	26951/184	Retinol	1.02	0.65	1.58	8
						β-carotene	0.86	0.54	1.36

## Sheet: Sheet2
beta-carotene
Author	Year	cancer type	type of study	Nutrient Type	OR	lci	uci
Roswall 1	2010	rectal cancer	Cohort study	beta-carotene	1.02	0.68	1.54
Roswall 2	2010	Colon cancer	Cohort study	beta-carotene	1.05	0.77	1.43
Maureen 1	2004	rectal cancer	Case-control study	beta-carotene(male)	0.9	0.5	1.4
Maureen 2	2004	rectal cancer	Case-control study	beta-carotene(female)	1.1	0.6	1.9
Dawn	2010	Colorectal Cancer	Case-control study	beta-carotene	0.52	0.38	0.71
Park 1	2009	rectal cancer	Cohort study	beta-carotene(male)	0.76	0.5	1.17
Park 2	2009	rectal cancer	Cohort study	beta-carotene(female)	1.26	0.75	2.11
Park 3	2009	Colon cancer	Cohort study	beta-carotene(male)	0.88	0.68	1.14
Park 4	2009	Colon cancer	Cohort study	beta-carotene(female)	0.89	0.67	1.18
Slattery	2000	Colon cancer	Case-control study	beta-carotene	1.18	0.94	1.49
Leenders 1	2014	Colon cancer	Case-control study	beta-carotene	0.69	0.52	0.94
Leenders 2	2014	rectal cancer	Case-control study	beta-carotene	1.25	0.84	1.86
Terry 1	2015	Colon cancer	Cohort study	beta-carotene	1.1	0.6	2.1
Terry 2	2015	rectal cancer	Cohort study	beta-carotene	1.7	0.7	4.1
Andre	2004	Colon cancer	Case-control study	beta-carotene	1.22	0.83	1.81
Lu 1	2015	Colorectal Cancer	Case-control study	beta-carotene(female)	0.92	0.58	1.47
Lu 2	2015	Colorectal Cancer	Case-control study	beta-carotene(male)	0.46	0.3	0.72
Valentina	2013	Colorectal Cancer	Case-control study	beta-carotene	0.52	0.37	0.72
Nancy 1	2002	Colon cancer	Cohort study	beta-carotene	0.9	0.7	1.2
Nancy 2	2002	rectal cancer	Cohort study	beta-carotene	1.1	0.7	1.8
Alpha-carotene
Park 1	2009	rectal cancer	Cohort study	Alpha-carotene(male)	0.91	0.6	1.37
Park 2	2009	rectal cancer	Cohort study	Alpha-carotene(female)	1.13	0.7	1.83
Park 3	2009	Colon cancer	Cohort study	Alpha-carotene(male)	0.98	0.76	1.26
Park 4	2009	Colon cancer	Cohort study	Alpha-carotene(female)	1.04	0.79	1.35
Slattery	2000	Colon cancer	Case-control study	Alpha-carotene	0.88	0.71	1.09
Terry 1	2015	Colon cancer	Cohort study	Alpha-carotene	0.9	0.5	1.5
Terry 2	2015	rectal cancer	Cohort study	Alpha-carotene	1.1	0.5	2.2
Andre	2004	Colon cancer	Case-control study	Alpha-carotene	1.04	0.71	1.52
Lu 1	2015	Colorectal Cancer	Case-control study	Alpha-carotene(male)	0.38	0.24	0.61
Lu 2	2015	Colorectal Cancer	Case-control study	Alpha-carotene(female)	0.58	0.37	0.9
Carotenoids
Park 1	2009	rectal cancer	Cohort study	Carotenoids(male)	0.83	0.55	1.27
Park 2	2009	rectal cancer	Cohort study	Carotenoids(female)	1.52	0.91	2.55
Park 3	2009	Colon cancer	Cohort study	Carotenoids(male)	1.14	0.89	1.46
Park 4	2009	Colon cancer	Cohort study	Carotenoids(female)	0.99	0.75	1.31
Terry 1	2015	Colon cancer	Cohort study	Carotenoids	1	0.6	1.8
Terry 2	2015	rectal cancer	Cohort study	Carotenoids	1.1	0.6	2.2
Andre	2004	Colon cancer	Case-control study	Carotenoids	1	0.68	1.48
Wang 1	2014	rectal cancer	Case-control study	Carotenoids(male)	1.27	0.77	2.11
Wang 2	2014	rectal cancer	Case-control study	Carotenoids(female)	1.02	0.5	2.08
Wang 3	2014	Colon cancer	Case-control study	Carotenoids(male)	1.31	0.77	2.23
Wang 4	2014	Colon cancer	Case-control study	Carotenoids(female)	0.8	0.44	1.47
Negri	2002	Colorectal Cancer	Case-control study	Carotenoids	0.65	0.6	0.7
Paiva	2004	Colorectal Cancer	Case-control study	Carotenoids	0.53	0.18	1.6
Wakai 1	2006	rectal cancer	Case-control study	Carotenoids(male)	1.05	0.58	1.91
Wakai 2	2006	rectal cancer	Case-control study	Carotenoids(female)	0.48	0.24	0.95
Wakai 3	2006	Colon cancer	Case-control study	Carotenoids(male)	0.86	0.5	1.49
Wakai 4	2006	Colon cancer	Case-control study	Carotenoids(female)	0.92	0.51	1.65
Shin 1	2006	rectal cancer	Cohort study	Carotenoids(female)	1	0.5	1.8
Shin 2	2006	Colon cancer	Cohort study	Carotenoids(female)	1.6	0.8	3.2
Lycopene
Maureen 1	2004	rectal cancer	Case-control study	Lycopene(male)	0.9	0.6	1.4
Maureen 2	2004	rectal cancer	Case-control study	Lycopene(female)	1.7	1	2.8
Park 1	2009	rectal cancer	Cohort study	Lycopene(male)	1.06	0.84	1.33
Park 2	2009	rectal cancer	Cohort study	Lycopene(female)	1.3	0.82	2.07
Park 3	2009	Colon cancer	Cohort study	Lycopene(male)	1.06	0.84	1.33
Park 4	2009	Colon cancer	Cohort study	Lycopene(female)	0.94	0.74	1.19
Slattery	2000	Colon cancer	Case-control study	Lycopene	0.96	0.79	1.19
Terry 1	2015	Colon cancer	Cohort study	Lycopene	1.3	0.8	2.2
Terry 2	2015	rectal cancer	Cohort study	Lycopene	0.7	0.3	1.4
Andre	2004	Colon cancer	Case-control study	Lycopene	0.71	0.49	1.03
Negri	2002	Colorectal Cancer	Case-control study	Lycopene	1.04	0.9	1.1
Lu 1	2015	Colorectal Cancer	Case-control study	Lycopene(male)	0.48	0.31	0.76
Lu 2	2015	Colorectal Cancer	Case-control study	Lycopene(female)	0.42	0.26	0.68
Lutein/Zeaxanthin
Maureen 1	2004	rectal cancer	Case-control study	Lutein/Zeaxanthin(male)	0.9	0.5	1.5
Maureen 2	2004	rectal cancer	Case-control study	Lutein/Zeaxanthin(female)	0.9	0.5	1.7
Park 1	2009	rectal cancer	Cohort study	Lutein/Zeaxanthin(male)	0.96	0.64	1.42
Park 2	2009	rectal cancer	Cohort study	Lutein/Zeaxanthin(female)	1.44	0.86	2.41
Park 3	2009	Colon cancer	Cohort study	Lutein/Zeaxanthin(male)	0.95	0.75	1.21
Park 4	2009	Colon cancer	Cohort study	Lutein/Zeaxanthin(female)	1.04	0.8	1.37
Slattery	2000	Colon cancer	Case-control study	Lutein/Zeaxanthin	0.83	0.66	1.04
Terry 1	2015	Colon cancer	Cohort study	Lutein/Zeaxanthin	1	0.5	1.8
Terry 2	2015	rectal cancer	Cohort study	Lutein/Zeaxanthin	2.1	0.9	4.9
Andre	2004	Colon cancer	Case-control study	Lutein/Zeaxanthin	1.2	0.82	1.75
Lu 1	2015	Colorectal Cancer	Case-control study	Lutein/Zeaxanthin(male)	0.65	0.42	1
Lu 2	2015	Colorectal Cancer	Case-control study	Lutein/Zeaxanthin(female)	1.06	0.68	1.65
beta-Cryptoxanthin
Park 1	2009	rectal cancer	Cohort study	beta-cryptoxanthin(male)	0.88	0.59	1.31
Park 2	2009	rectal cancer	Cohort study	beta-cryptoxanthin(female)	0.92	0.56	1.51
Park 3	2009	Colon cancer	Cohort study	beta-cryptoxanthin(male)	0.88	0.68	1.12
Park 4	2009	Colon cancer	Cohort study	beta-cryptoxanthin(female)	0.93	0.71	1.21
Terry 1	2015	Colon cancer	Cohort study	beta-Cryptoxanthin	1.7	0.9	3.3
Terry 2	2015	rectal cancer	Cohort study	beta-Cryptoxanthin	0.7	0.3	1.4
Andre	2004	Colon cancer	Case-control study	beta-Cryptoxanthin	0.96	0.66	1.4
Lu 1	2015	Colorectal Cancer	Case-control study	beta-cryptoxanthin(male)	0.16	0.09	0.26
Lu 2	2015	Colorectal Cancer	Case-control study	beta-cryptoxanthin(female)	0.3	0.18	0.49
Retinol
Leenders 1	2014	Colon cancer	Case-control study	Retinol	1.14	0.84	1.55
Leenders 2	2014	rectal cancer	Case-control study	Retinol	0.86	0.55	1.32
Wang 1	2014	rectal cancer	Case-control study	Retinol(male)	1.61	1.01	2.58
Wang 2	2014	rectal cancer	Case-control study	Retinol(female)	0.66	0.35	1.23
Wang 3	2014	Colon cancer	Case-control study	Retinol(male)	1.41	0.9	2.22
Wang 4	2014	Colon cancer	Case-control study	Retinol(female)	0.49	0.28	0.85
Negri	2002	Colorectal Cancer	Case-control study	Retinol	0.85	0.7	1.1
Levi	2000	Colorectal Cancer	Case-control study	Retinol	1.19	0.8	1.9
Timothy	2012	Colorectal Cancer	Case-control study	Retinol	1.03	0.76	1.39
Wakai 1	2006	rectal cancer	Case-control study	Retinol(male)	0.99	0.6	1.63
Wakai 2	2006	rectal cancer	Case-control study	Retinol(female)	1.2	0.67	2.17
Wakai 3	2006	Colon cancer	Case-control study	Retinol(male)	1.18	0.67	2.08
Wakai 4	2006	Colon cancer	Case-control study	Retinol(female)	0.76	0.4	1.48
Shin 1	2006	rectal cancer	Cohort study	Retinol(female)	0.7	0.4	1.3
Shin 2	2006	Colon cancer	Cohort study	Retinol(female)	1.3	0.7	2.6
Retinol(serum)
Kabat	2012	Colorectal Cancer	Cohort study	Retinol(serum)	1.58	0.89	2.81
Luo 1	2019	rectal cancer	Case-control study	Retinol(serum)	0.41	0.2	0.71
Luo 2	2019	Colon cancer	Case-control study	Retinol(serum)	0.22	0.13	0.36
Malila	2002	Colorectal Cancer	Cohort study	Retinol(serum)	1.02	0.65	1.58
Carotenoids(serum)
Kabat	2012	Colorectal Cancer	Cohort study	Alpha-carotene	0.81	0.48	1.37
Kabat	2012	Colorectal Cancer	Cohort study	beta-carotene	0.81	0.48	1.37
Kabat	2012	Colorectal Cancer	Cohort study	Lycopene	0.97	0.58	1.6
Kabat	2012	Colorectal Cancer	Cohort study	beta-Cryptoxanthin	1.1	0.67	1.83
Kabat	2012	Colorectal Cancer	Cohort study	Lutein/Zeaxanthin	1.31	0.76	2.28
Huang	2017	Colorectal Cancer	Case-control study	Alpha-carotene	0.49	0.33	0.72
Huang	2017	Colorectal Cancer	Case-control study	beta-carotene	0.82	0.56	1.22
Huang	2017	Colorectal Cancer	Case-control study	Lycopene	0.36	0.24	0.54
Huang	2017	Colorectal Cancer	Case-control study	beta-Cryptoxanthin	0.44	0.29	0.66
Huang	2017	Colorectal Cancer	Case-control study	Lutein/Zeaxanthin	0.82	0.56	1.2
Malila	2002	Colorectal Cancer	Cohort study	beta-carotene	0.86	0.54	1.36
